# Supplementary material for: Peroxiredoxin I and II as novel therapeutic molecular targets in cervical cancer treatment through regulation of endoplasmic reticulum stress induced by bleomycin
Source: PubMed Central journal article supplement (PMC11143287; doi:10.1038/s41420-024-02039-7), 2024-05-31
Supplement: 41420_2024_2039_MOESM1_ESM.pdf [file 41420_2024_2039_MOESM1_ESM.pdf]

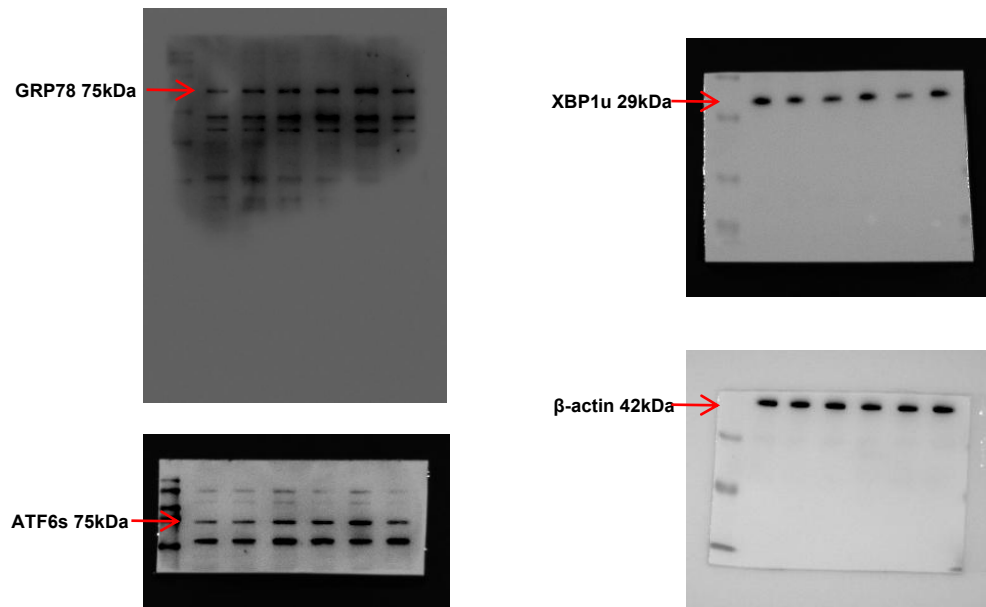

Fig1. C BLM(0,6,12,24,48(h))

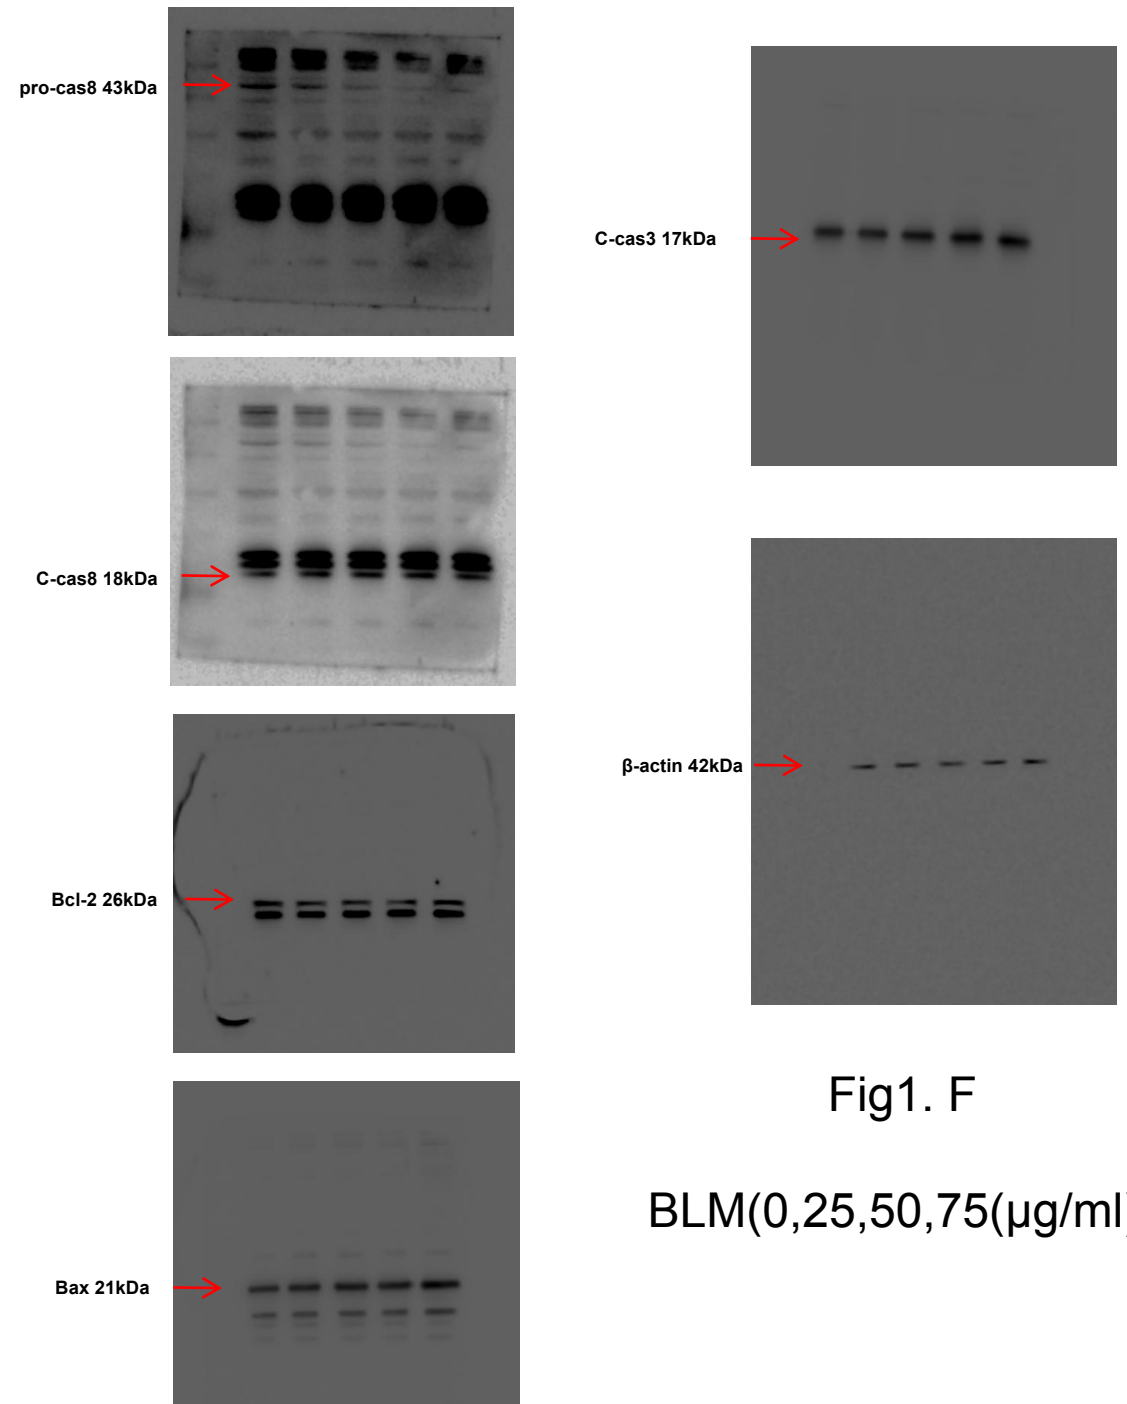

Fig1. F

BLM(0,25,50,75(μg/ml))

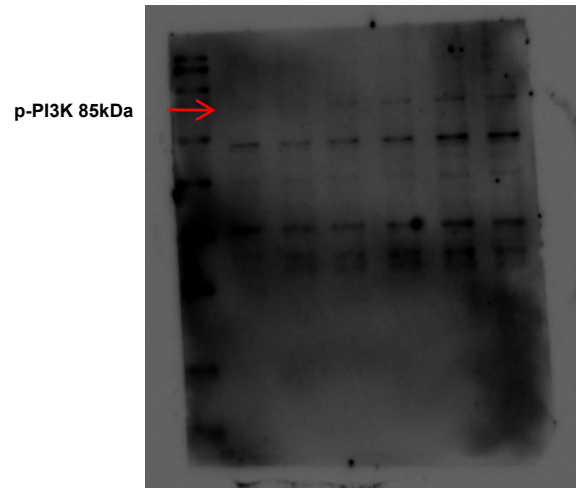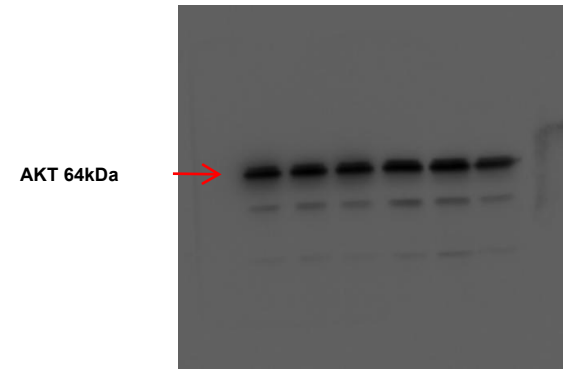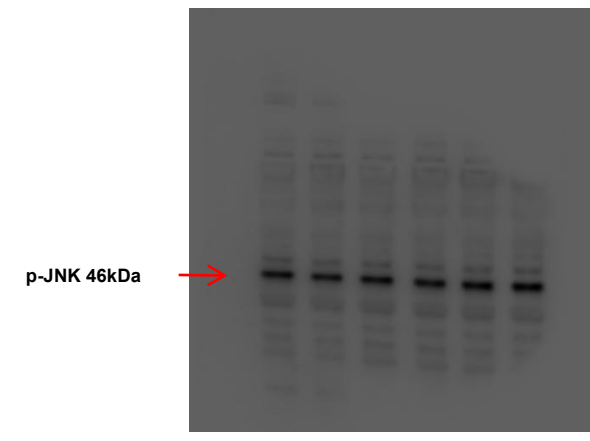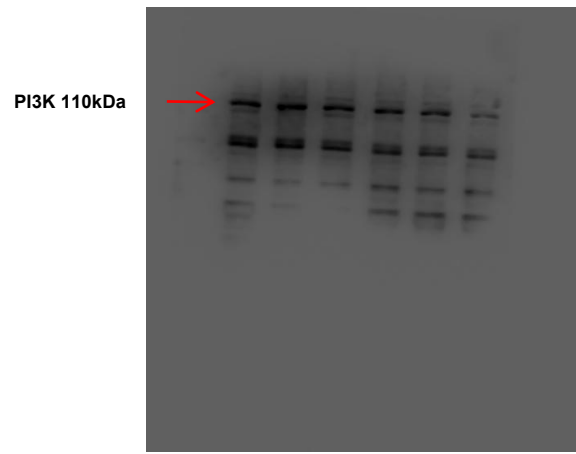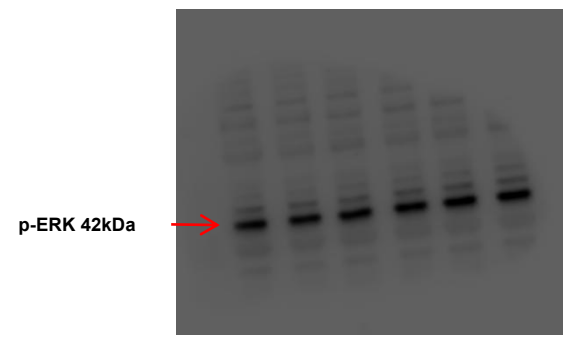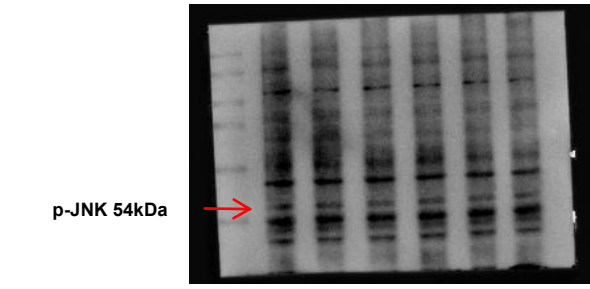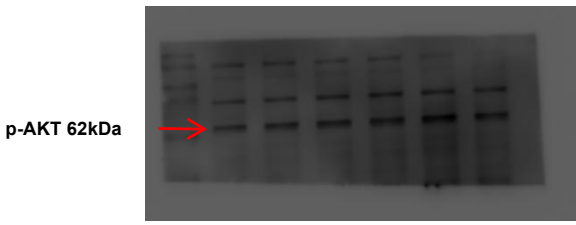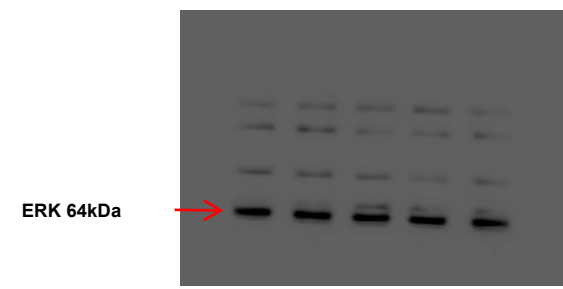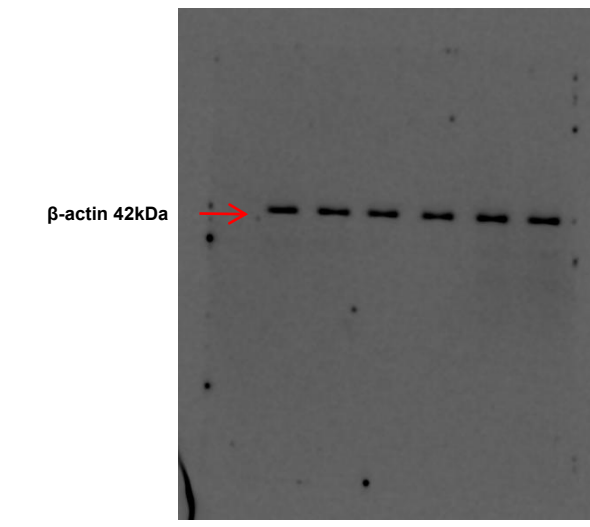

Fig2. C  
BLM(0,6,12,24,48(h))

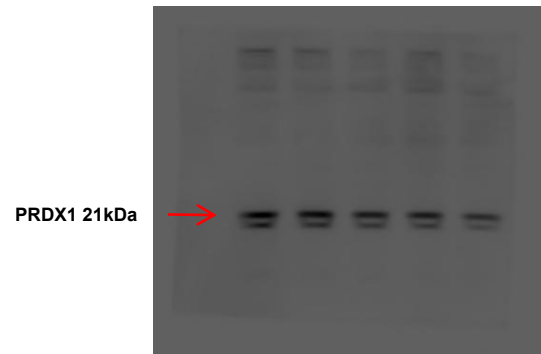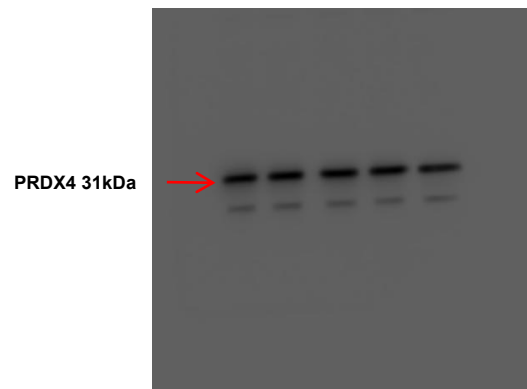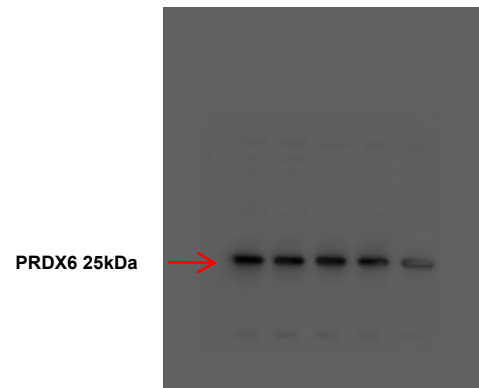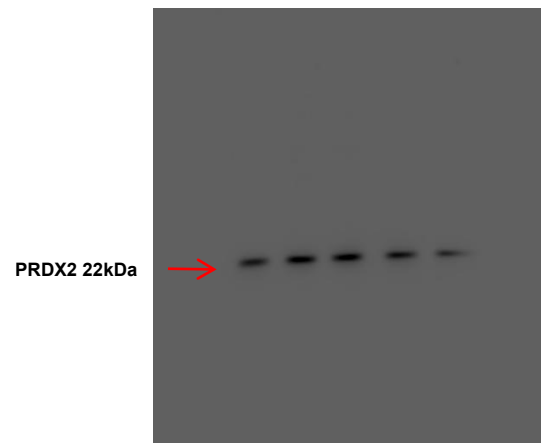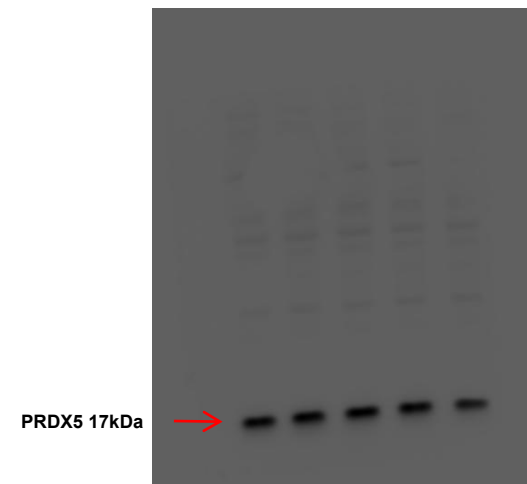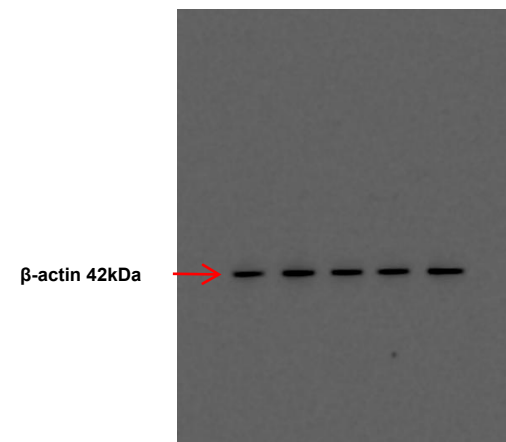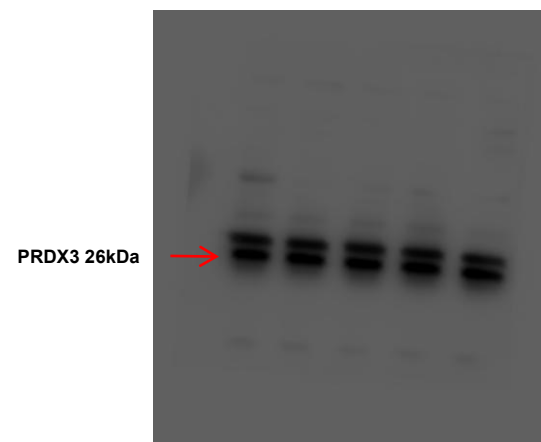

Fig2. D  
BLM(0,25,50,75( $\mu$ g/ml))

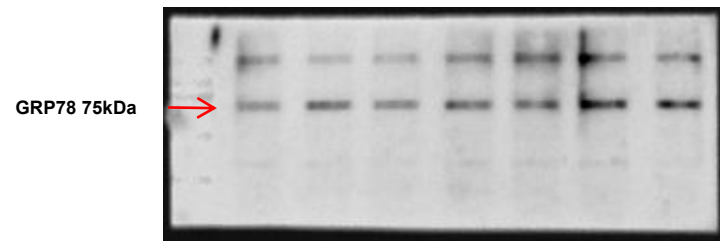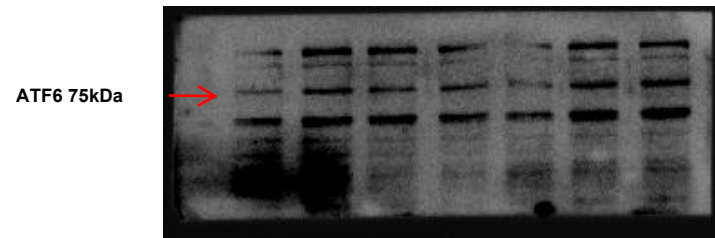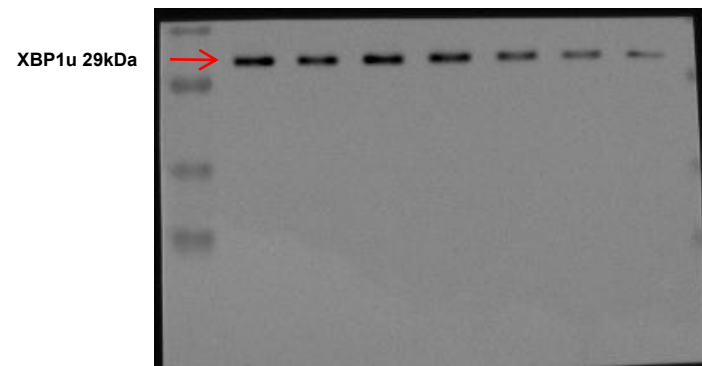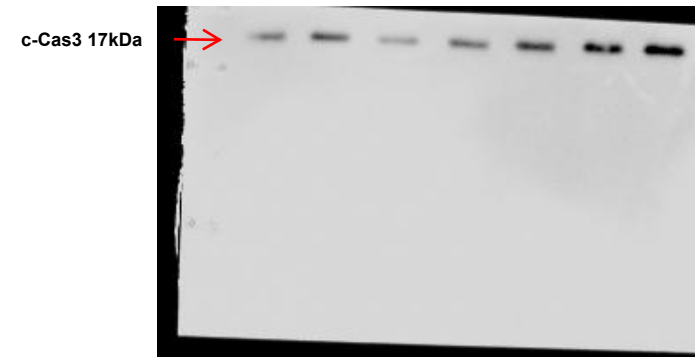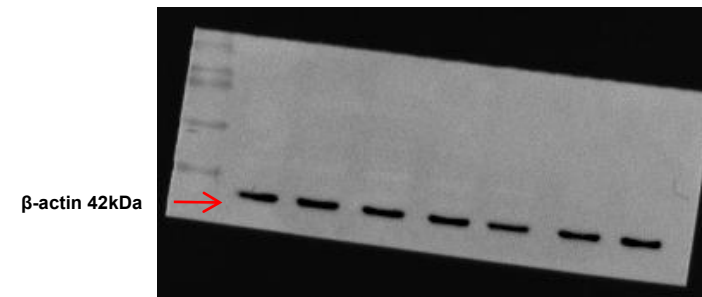

Fig2. F

BLM(0,75( $\mu$ g/ml))(Conodin A (5 $\mu$ m),Conodin A + BLM 25,Conodin A + BLM 50,Conodin A + BLM 75( $\mu$ g/ml))

PRDX1 21kDa

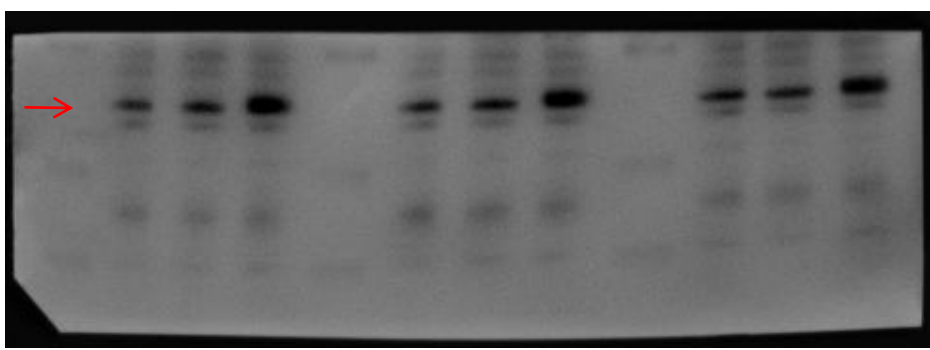

His-Tag 23kDa

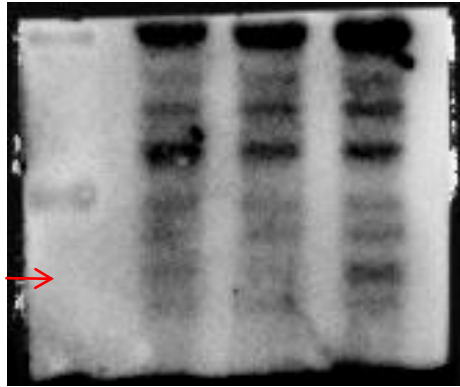

$\beta$ -actin 42kDa

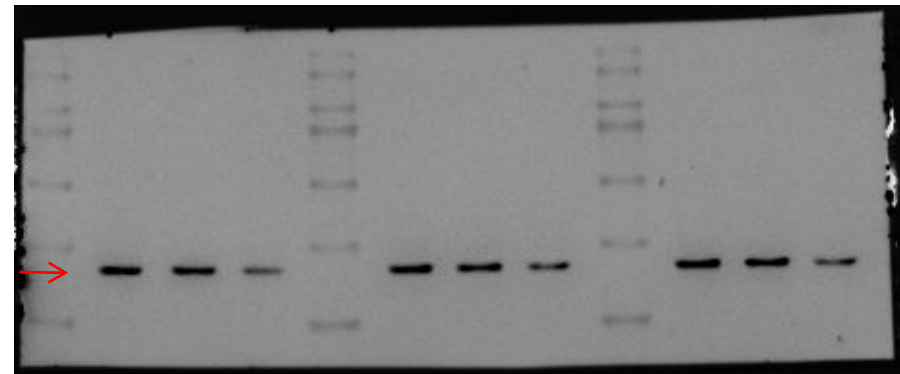

Fig3. E

SiHa (Blank,Mock,ov-PRDX1)

PRDX2 22kDa

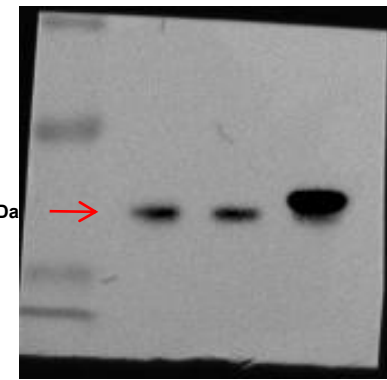

His-Tag 23kDa

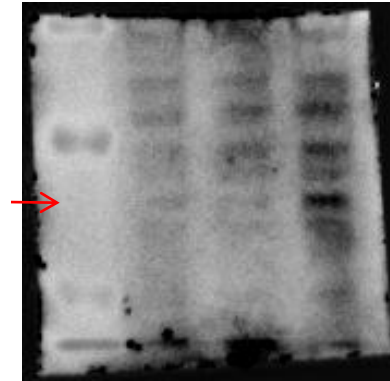

$\beta$ -actin 42kDa

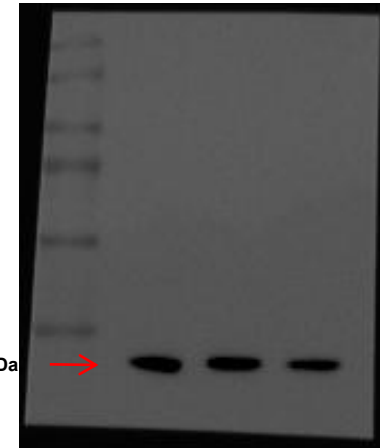

Fig3. F

SiHa (Blank,Mock,ov-PRDX2)

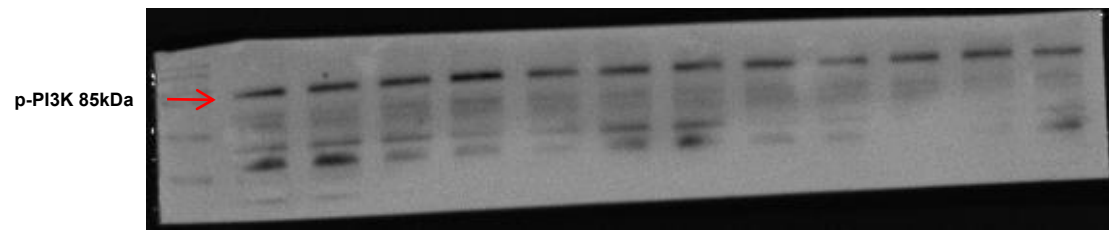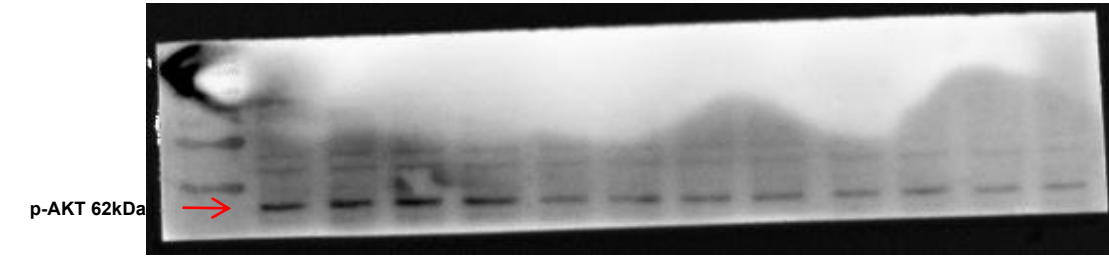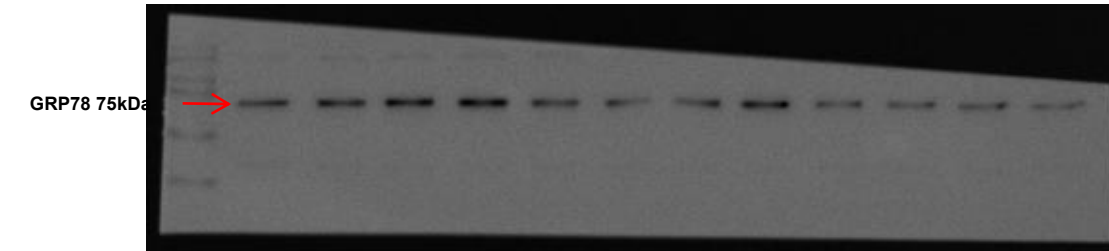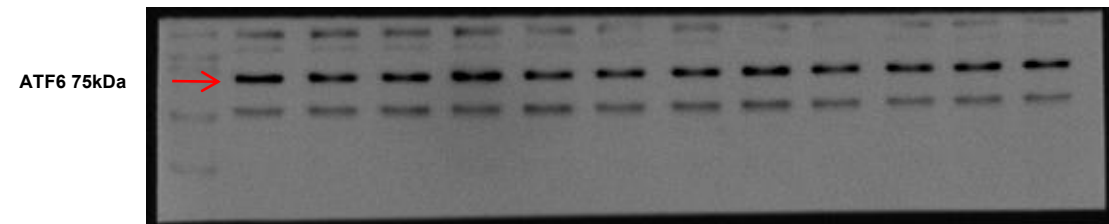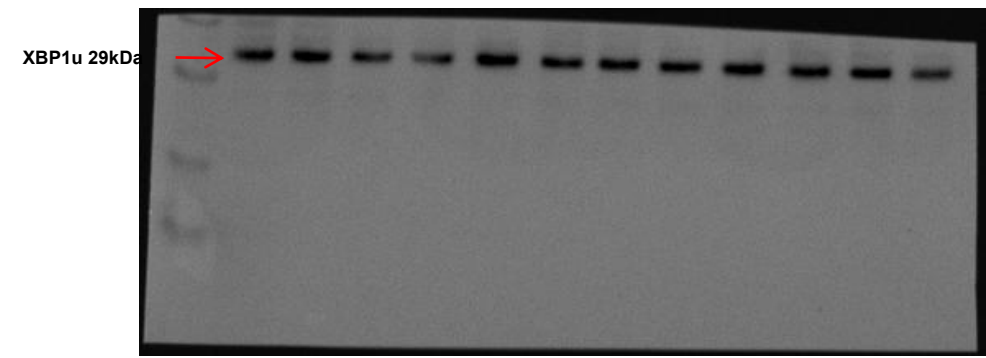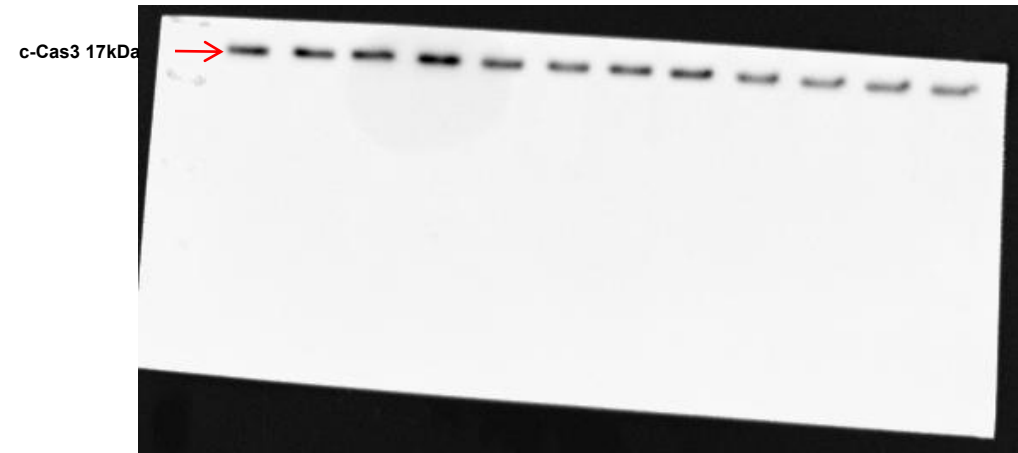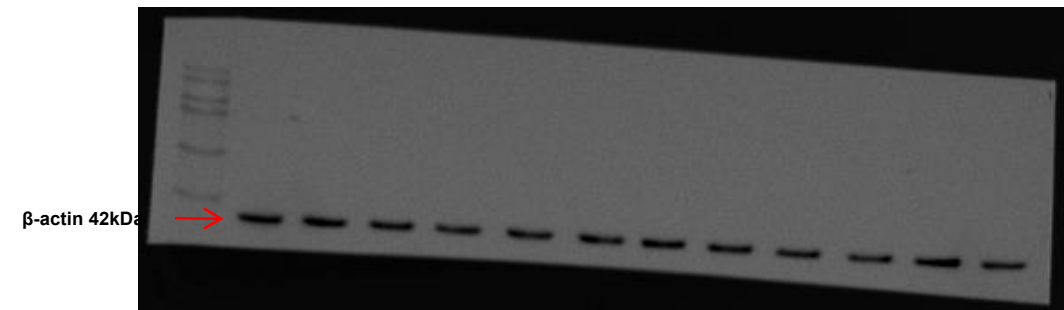

Fig4. C

SiHa Mock(BLM0,12,24,48(h))SiHa ov-PRDX1(BLM0,12,24,48(h))SiHa ov-PRDX2(BLM0,12,24,48(h))

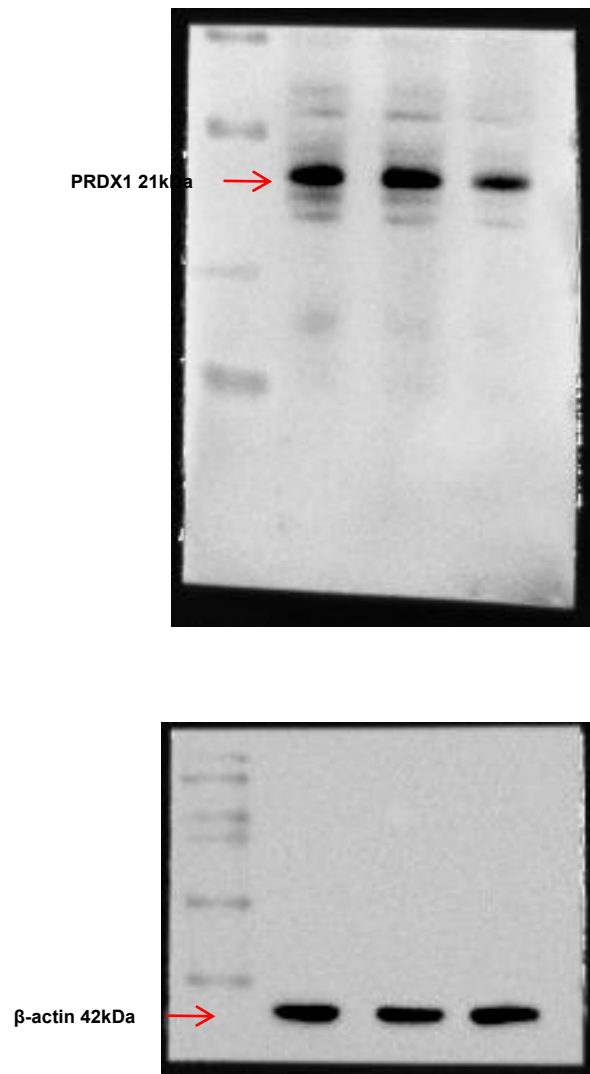

Fig5. A  
SiHa (Blank,Mock,sh-PRDX1)

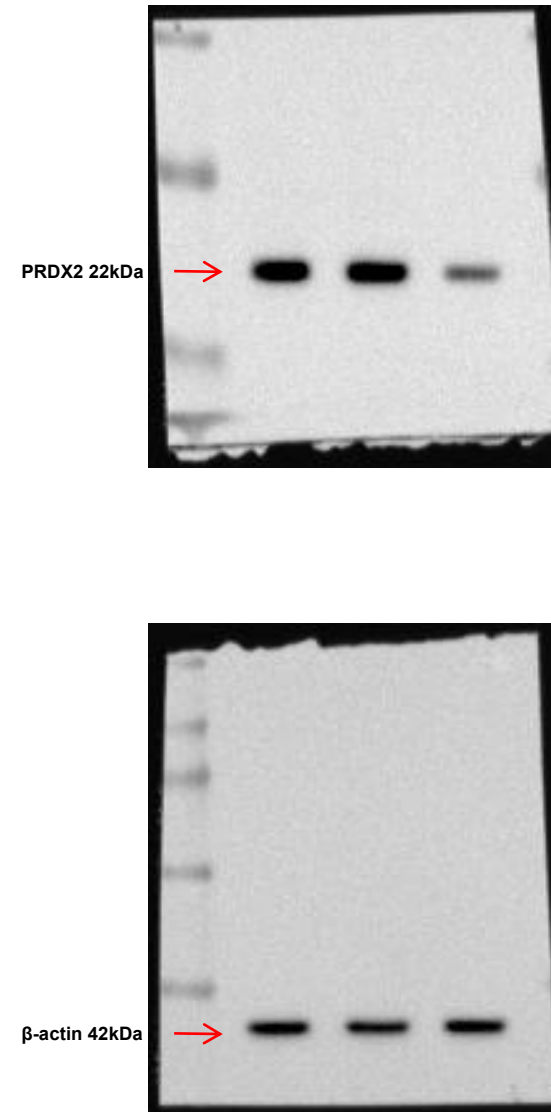

Fig5. B  
SiHa (Blank,Mock,sh-PRDX2)

p-PI3K 85kDa

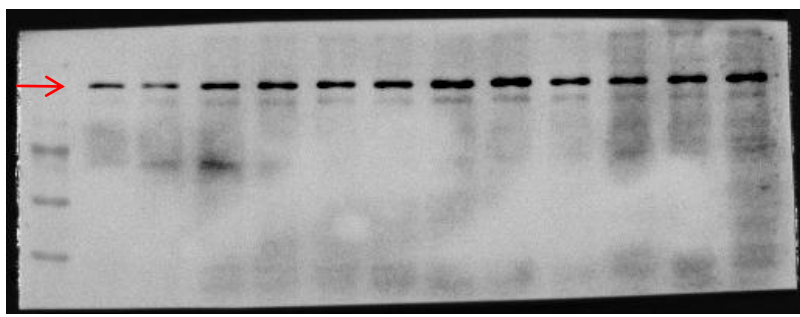

XBP1u 29kDa

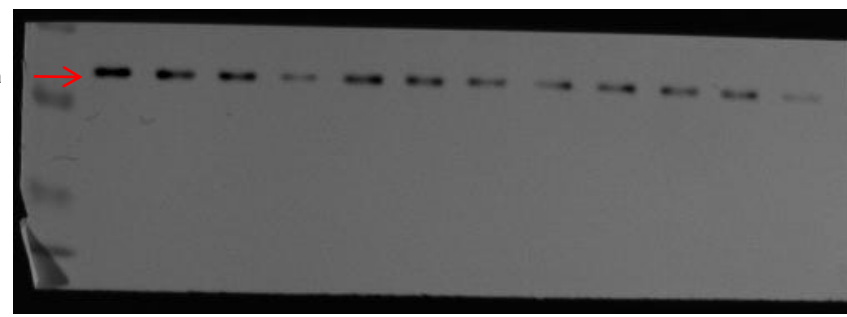

p-AKT 62kDa

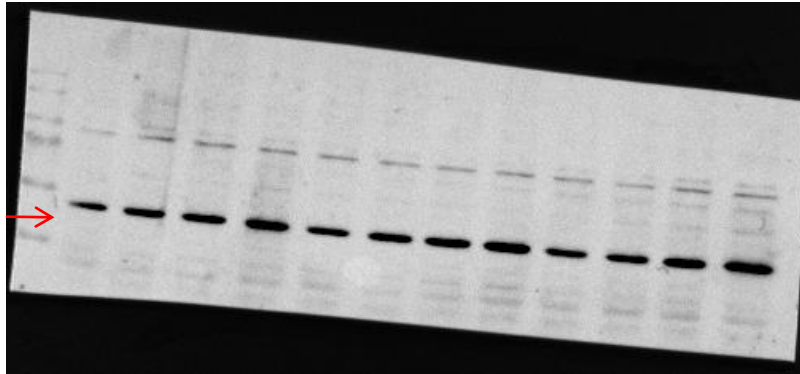

c-Cas3 17kDa

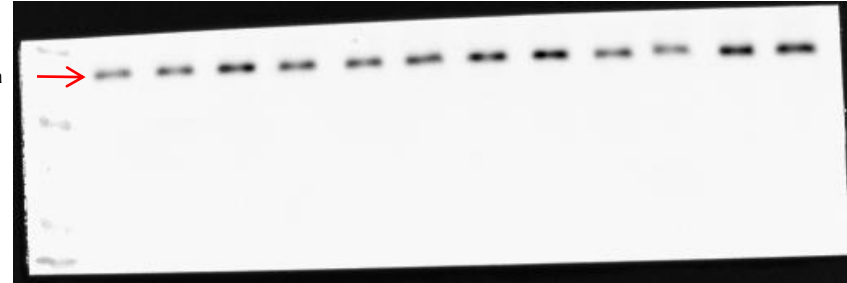

GRP78 75kDa

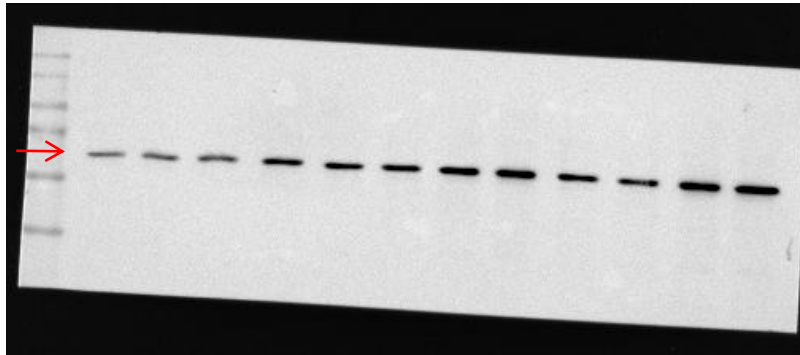

$\beta$ -actin 42kDa

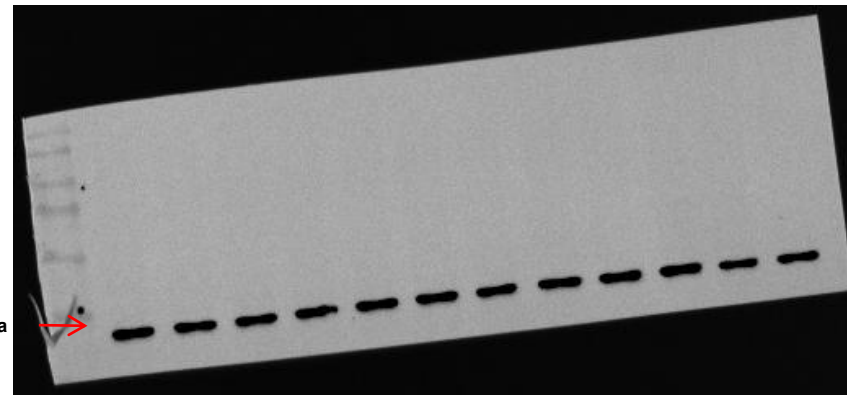

ATF6 75kDa

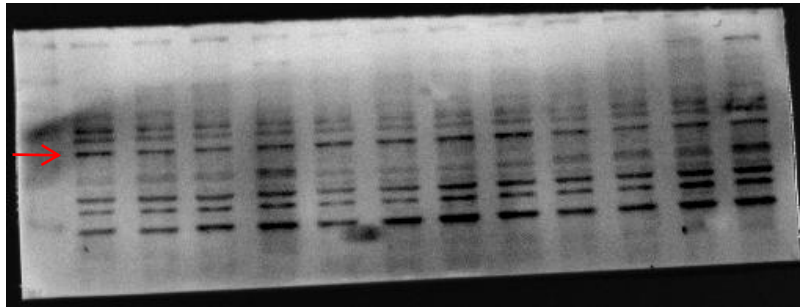

Fig5. E SiHa Mock(BLM0,12,24,48(h))SiHa sh-PRDX1(BLM0,12,24,48(h))SiHa sh-PRDX2(BLM0,12,24,48(h))
